# Supplementary material for: Serum metabonomic analysis of apoE−/− mice reveals progression axes for atherosclerosis based on NMR spectroscopy
Source: Royal Society of Chemistry journal article supplement (doi:10.1039/c4mb00334a), 2014-08-01

### Supplementary

S1: Permutation test plot for the OPLS model of LDL (number of permutations, 100; intercepts:  $R^2=0.0, 0.02$ ;  $Q^2=0.0, -0.04$ ).

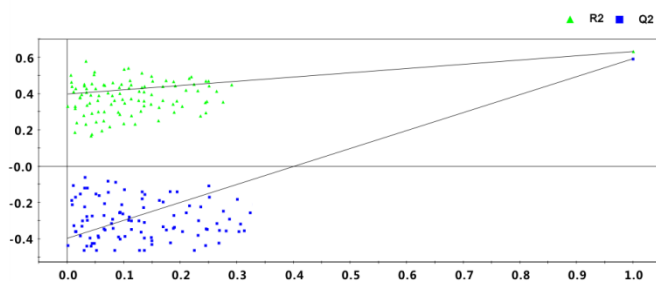

S2: Permutation test plot for the OPLS model of HDL (number of permutations, 200; intercepts:  $R^2=0.0, 0.03$ ;  $Q^2=0.0, -0.06$ ).

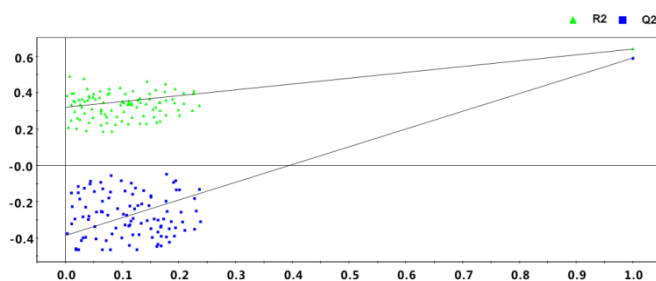

S3: Permutation test plot for the OPLS model of TC (number of permutations, 200; intercepts:  $R^2=0.0, 0.01$ ;  $Q^2=0.0, -0.07$ ).

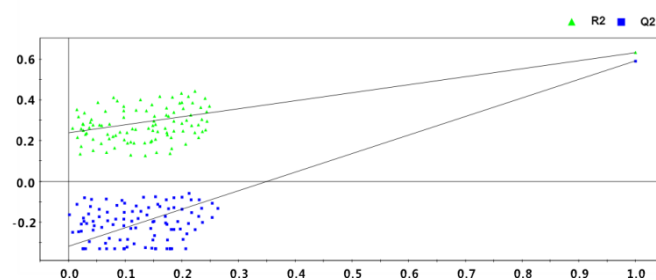

S4: Permutation test plot for the OPLS model of LDL (number of permutations, 200; intercepts:  $R^2=0.0, 0.02$ ;  $Q^2=0.0, -0.03$ ).

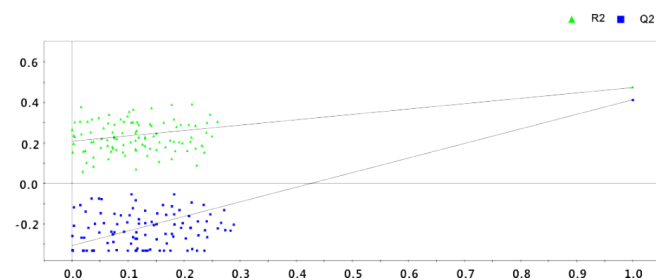

Supplement: c4mb00334a1.pdf [file c4mb00334a1.pdf]
